# Supplementary material for: Facile Preparation of TiO2 Nanobranch/Nanoparticle Hybrid Architecture with Enhanced Light Harvesting Properties for Dye‐Sensitized Solar Cells
Source: Hindawi journal article supplement (doi:10.1155/2015/139715), 2015-01-01
Supplement: f1 [file 139715.f1.pdf]

## Supporting Tables

**Table S1.** The diameter and length of TiO<sub>2</sub> nanorods samples

| Sample    | Diameter (nm) | Length (μm) |
|-----------|---------------|-------------|
| Sample 1  | 80            | 1.84        |
| Sample 2  | 78            | 1.72        |
| Sample 3  | 98            | 1.96        |
| Sample 4  | 107           | 1.98        |
| Sample 5  | 120           | 2.14        |
| Sample 6  | 124           | 2.42        |
| Sample 7  | 94            | 1.83        |
| Sample 8  | 103           | 1.89        |
| Sample 9  | 118           | 2.33        |
| Sample 10 | 103           | 2.03        |

**Table 2.** Average and standard deviation of diameter and length of TiO<sub>2</sub> nanorod based on table 1.

|                    | Diameter (nm) | Length (μm) |
|--------------------|---------------|-------------|
| Average            | 103.0         | 2.01        |
| Standard deviation | 14.9          | 0.21        |

To determine the standard deviation of diameter and length of TiO<sub>2</sub> nanorods, ten TiO<sub>2</sub> nanorod samples are prepared. As shown in Table S1, the average of diameter is  $103 \pm 14.9$  nm and average length is  $2.01 \pm 0.21$  μm.

## Supporting Figures

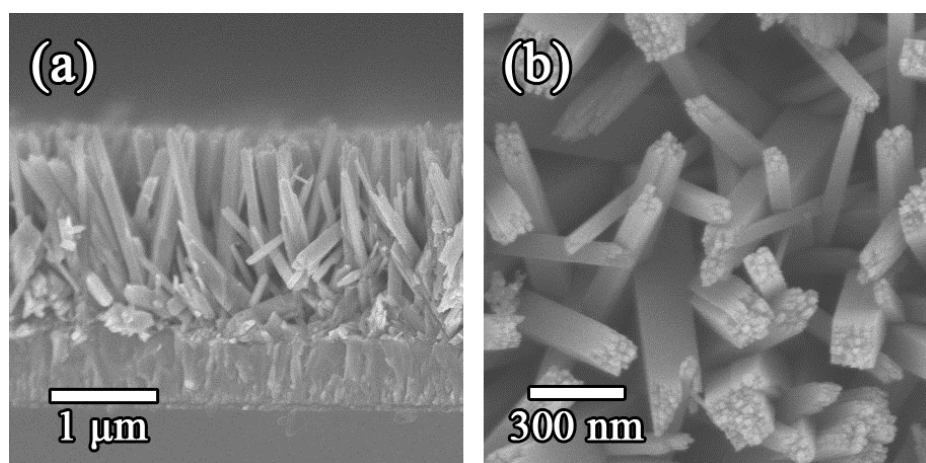

**Figure S1.** (a) Cross-sectional view and (b) Top-view FESEM images of TiO<sub>2</sub> nanorods used as a stem of nano-branches/nanoparticles hybrid architecture.

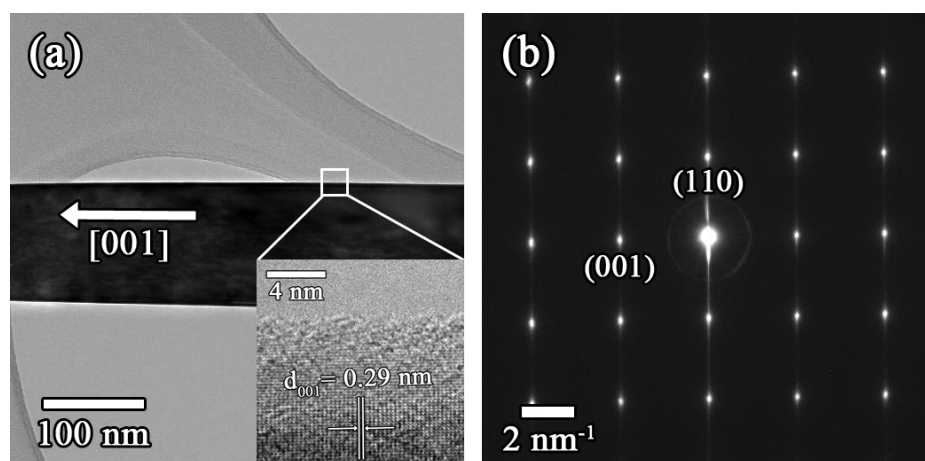

**Figure S2.** (a) TEM image (inset shows HRTEM image) and (b) Selected area electron diffraction (SAED) pattern of single TiO<sub>2</sub> nanorod.

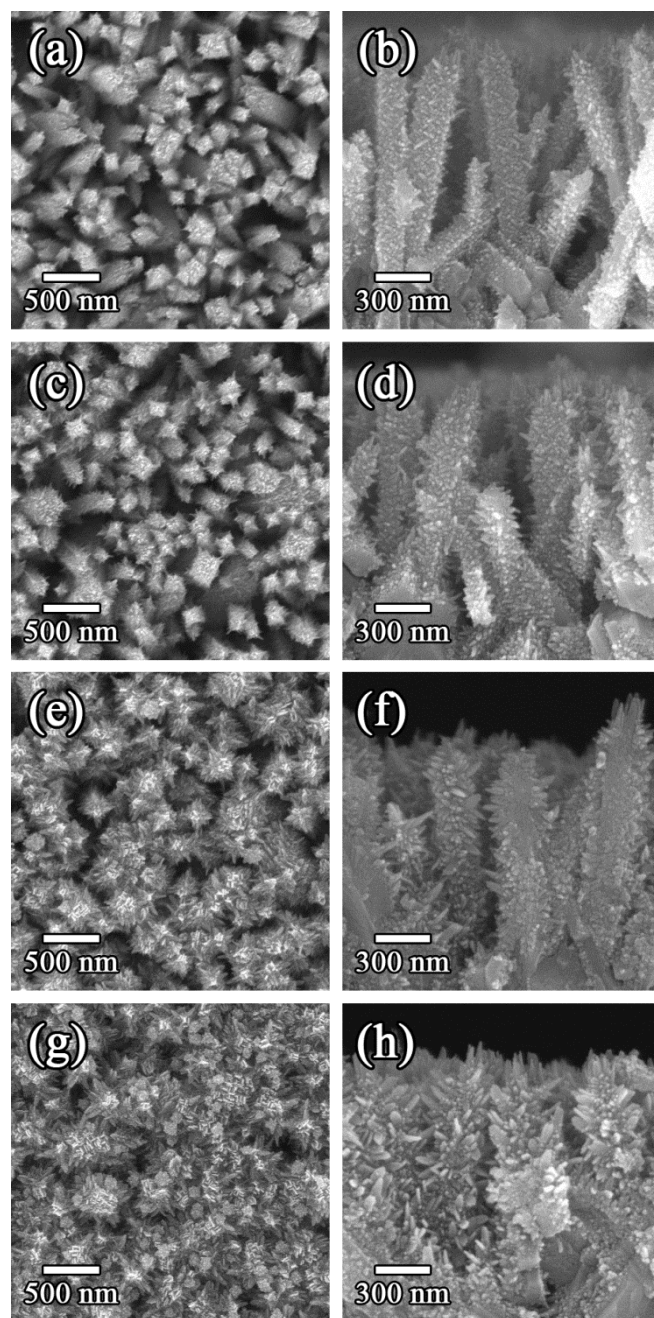

**Figure S3.** SEM images of  $\text{TiO}_2$  NRs with prolonged  $\text{TiCl}_3$  treatment time. (a) 30min, (b) 60min, (c) 120min, and (d) 240min.

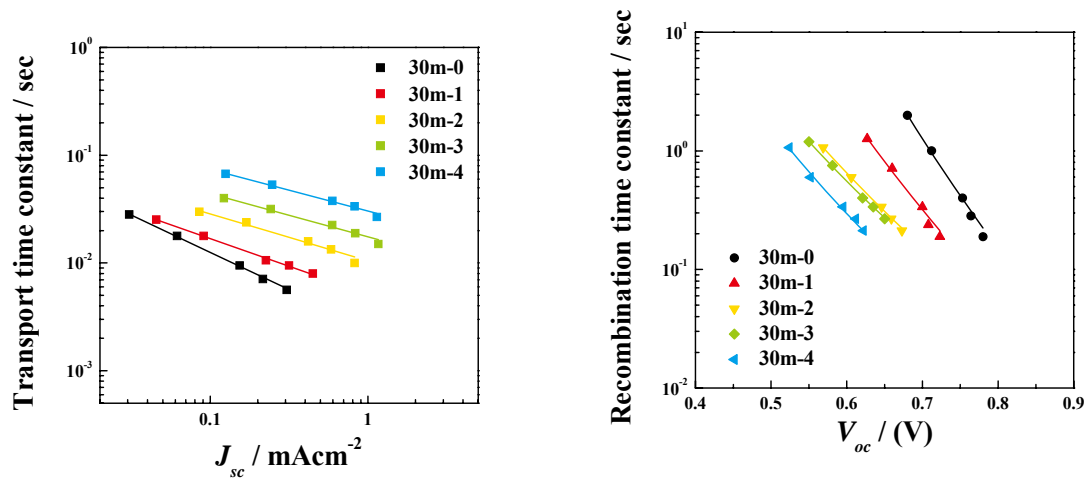

**Figure S4.** IMPS and IMVS data of TiO<sub>2</sub> nano-branches/nanoparticles hybrid architecture based DSSCs with multiple TiCl<sub>3</sub> treatments.
